# Supplementary material
Source: PubMed Central journal article supplement (PMC9022907)

## Supplementary Figures for:

### Identification of $\alpha$ 1,2-Fucosylated Signaling and Adhesion Molecules in Head and Neck Squamous Cell Carcinoma

Brittany Montesino<sup>1</sup>, Agata Steenackers<sup>1</sup>, Juan M Lozano<sup>2</sup>, Geoffrey D. Young<sup>3,4</sup>, Nan Hu<sup>5</sup>, Robert Sackstein<sup>1</sup>, Kevin Brown Chandler<sup>1\*</sup>

<sup>1</sup> Translational Glycobiology Institute, Department of Translational Medicine, Herbert Wertheim College of Medicine, Florida International University, Miami, FL 33199 USA

<sup>2</sup> Division of Medical and Population Health Science Education and Research, Florida International University Herbert Wertheim College of Medicine, Miami, FL, USA.

<sup>3</sup> Miami Cancer Institute Miami, FL, 33176 USA

<sup>4</sup> Department of Surgery, Herbert Wertheim College of Medicine, Florida International University, Miami, FL 33199 USA

<sup>5</sup> Robert Stempel College of Public Health and Social Work, Florida International University, Miami, FL 33199 USA

\*Corresponding Author. Phone: 305.348.9136, Email: [kchandle@fiu.edu](mailto:kchandle@fiu.edu), ORCID: 0000-0001-5514-9652

# Supplementary Figures

## Table of Contents

|                                                                                                                |      |
|----------------------------------------------------------------------------------------------------------------|------|
| Supplementary Figure 1: FUT1 Kaplan-Meier Survival Analysis.....                                               | p. 3 |
| Supplementary Figure 2: Flow Cytometry Analysis of Head and Neck Cancer Cell Line Panel, H-antigen (87-N)..... | p. 4 |
| Supplementary Figure 3: Flow Cytometry Analysis of Head and Neck Cancer Cell Line Panel, Lewis Y (F3).....     | p. 5 |
| Supplementary Figure 4: Flow Cytometry Analysis of Head and Neck Cancer Cell Line Panel, Lewis B .....         | p. 6 |
| Supplementary Figure 5: Parameters for Mass Spectrometry Data Analysis (Proteome Discoverer/Byonic.....        | p. 7 |
| Supplementary Figure 6: MS2 Spectrum of EGFR Site N389 EGFR Glycopeptide from HSC-3 Cells.....                 | p. 8 |

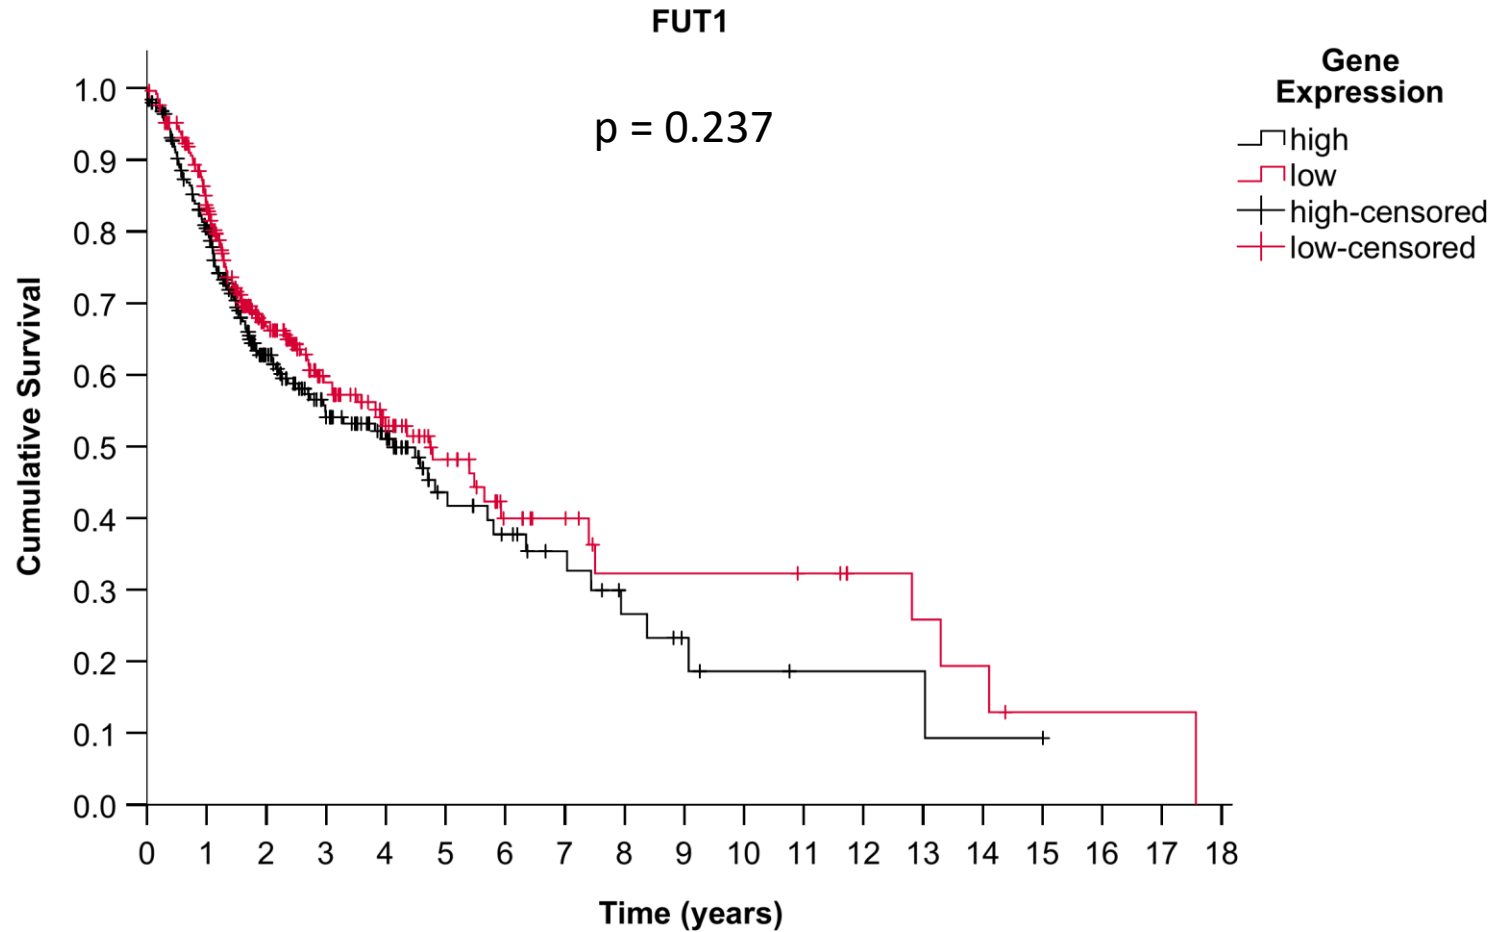

**Supplementary Figure 1 : Kaplan-Meier Survival Analysis Indicates that FUT1 Expression is not Associated with Survival in Head and Neck Cancer.** P-values of  $<0.05$  were considered to be statistically significant. The study group consisted of all patient primary tumor tissue data from the Head and Neck Cancer dataset found on The Cancer Genome Atlas Genomic Data Commons database version 18.0 ( $n=499$ ). The median mRNA gene expression was utilized as the cutoff to denote high and low gene expression, quantified using HTseq and reported in fragments per kilobase of transcript per million mapped reads (FPKM). To compliment the findings, multivariate Cox regression analysis was conducted which also found that FUT1 gene expression was not an independent predictor of survival (HR = 1.094 ( 95% CI 0.829-1.445)),  $p = 5.25 \times 10^{-1}$  ).

**Head & Neck Cancer  
Cell Line Panel**

**Flow Cytometry  
H antigen (87-N)**

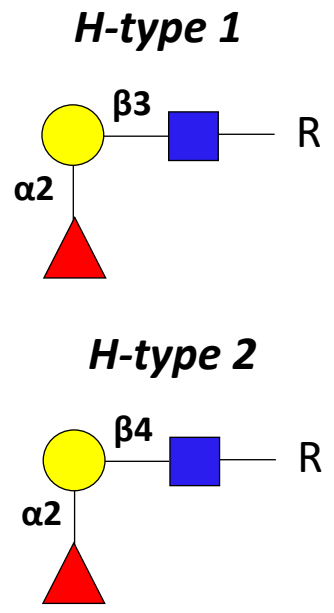

A Isotype control  
 B LeY  
 \* metastatic

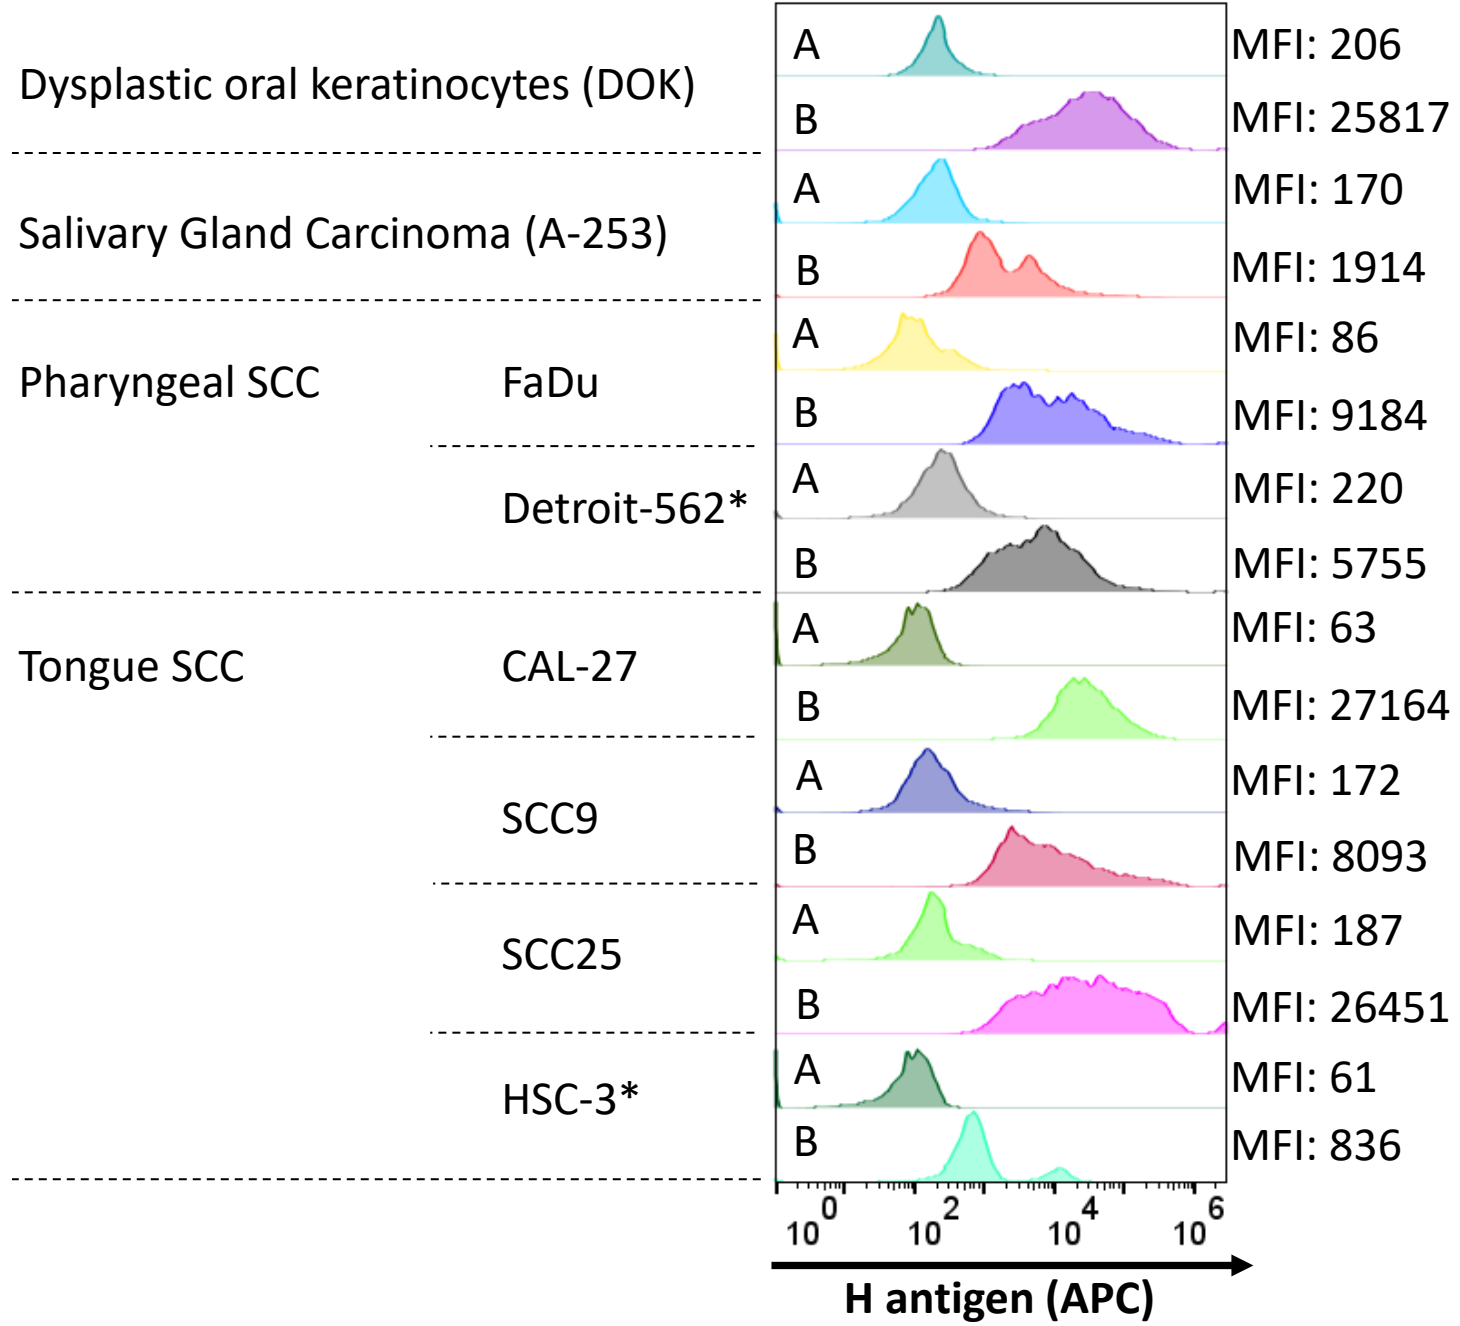

**Head & Neck Cancer  
Cell Line Panel**

**Flow Cytometry  
Lewis Y (LeY)**

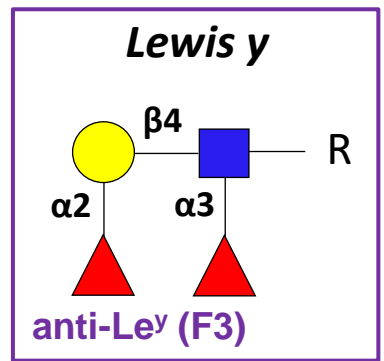

A Isotype control  
 B LeY  
 \* metastatic

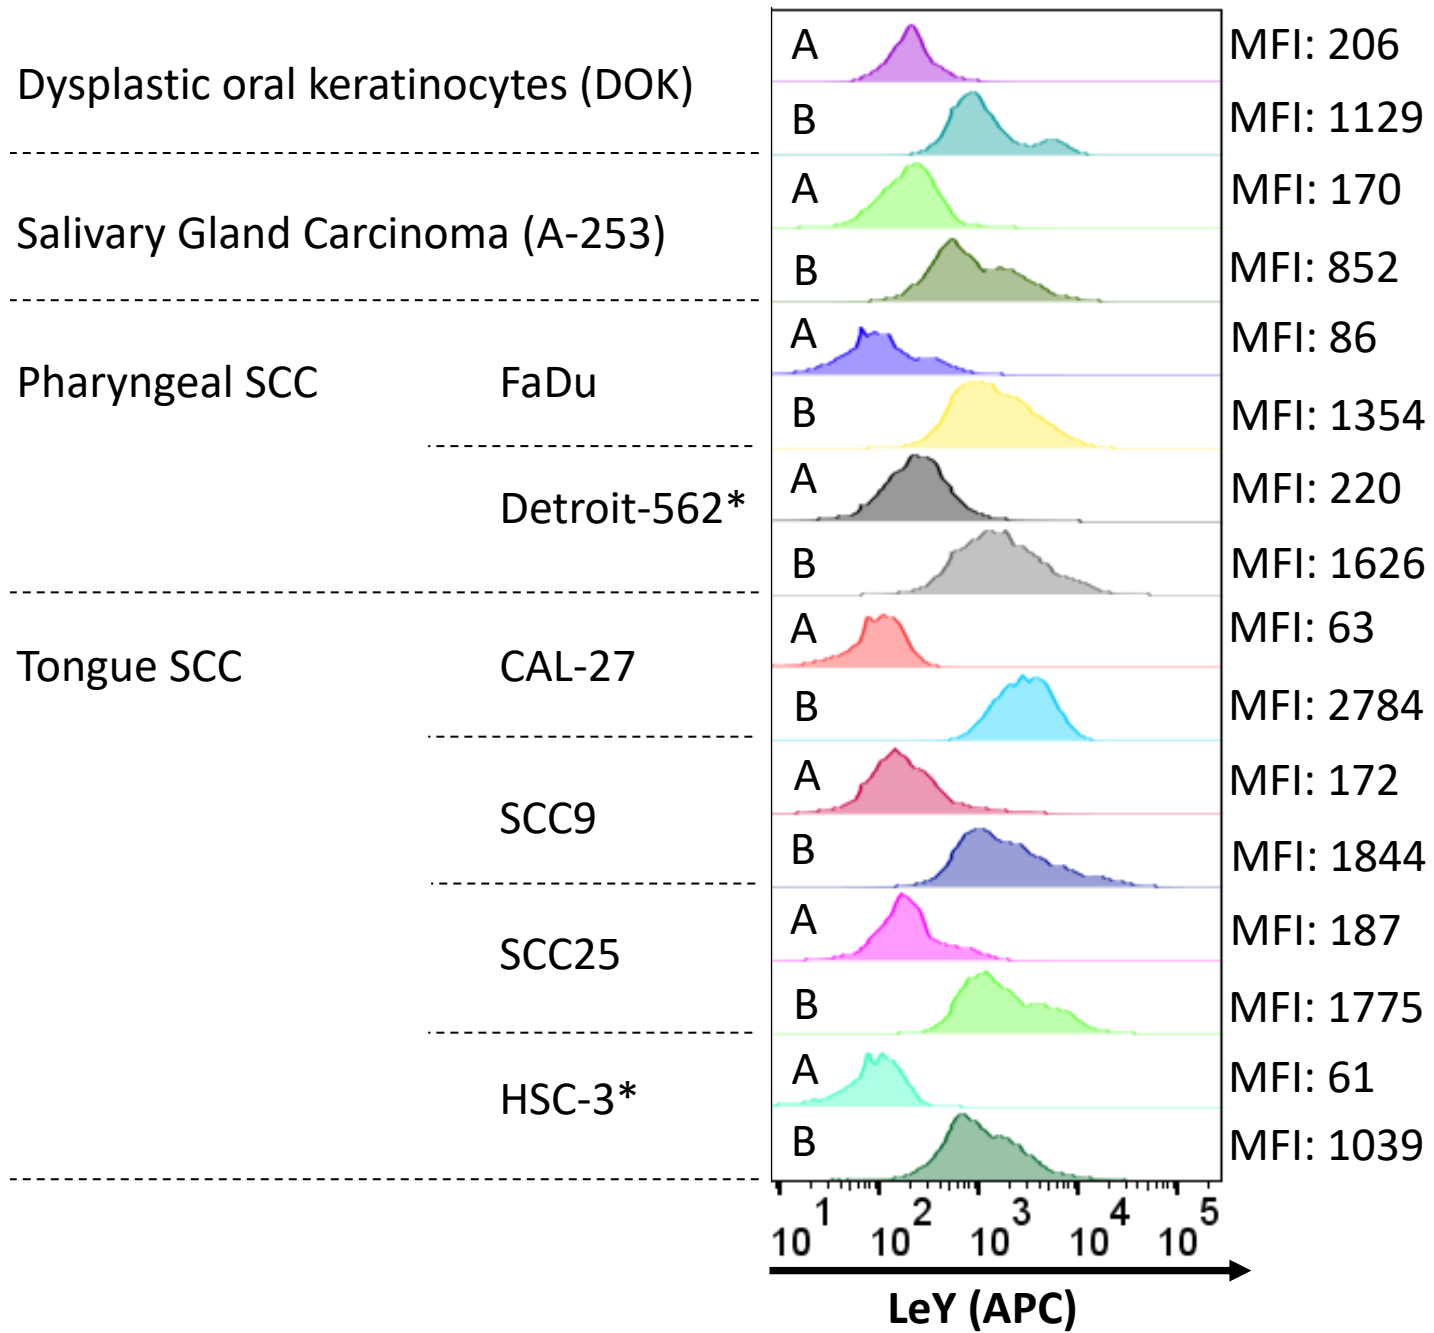

**Head & Neck Cancer  
Cell Line Panel**

**Flow Cytometry  
Lewis B (LeB)**

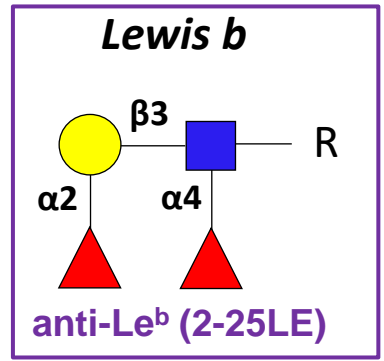

A Isotype control  
 B LeY  
 \* metastatic

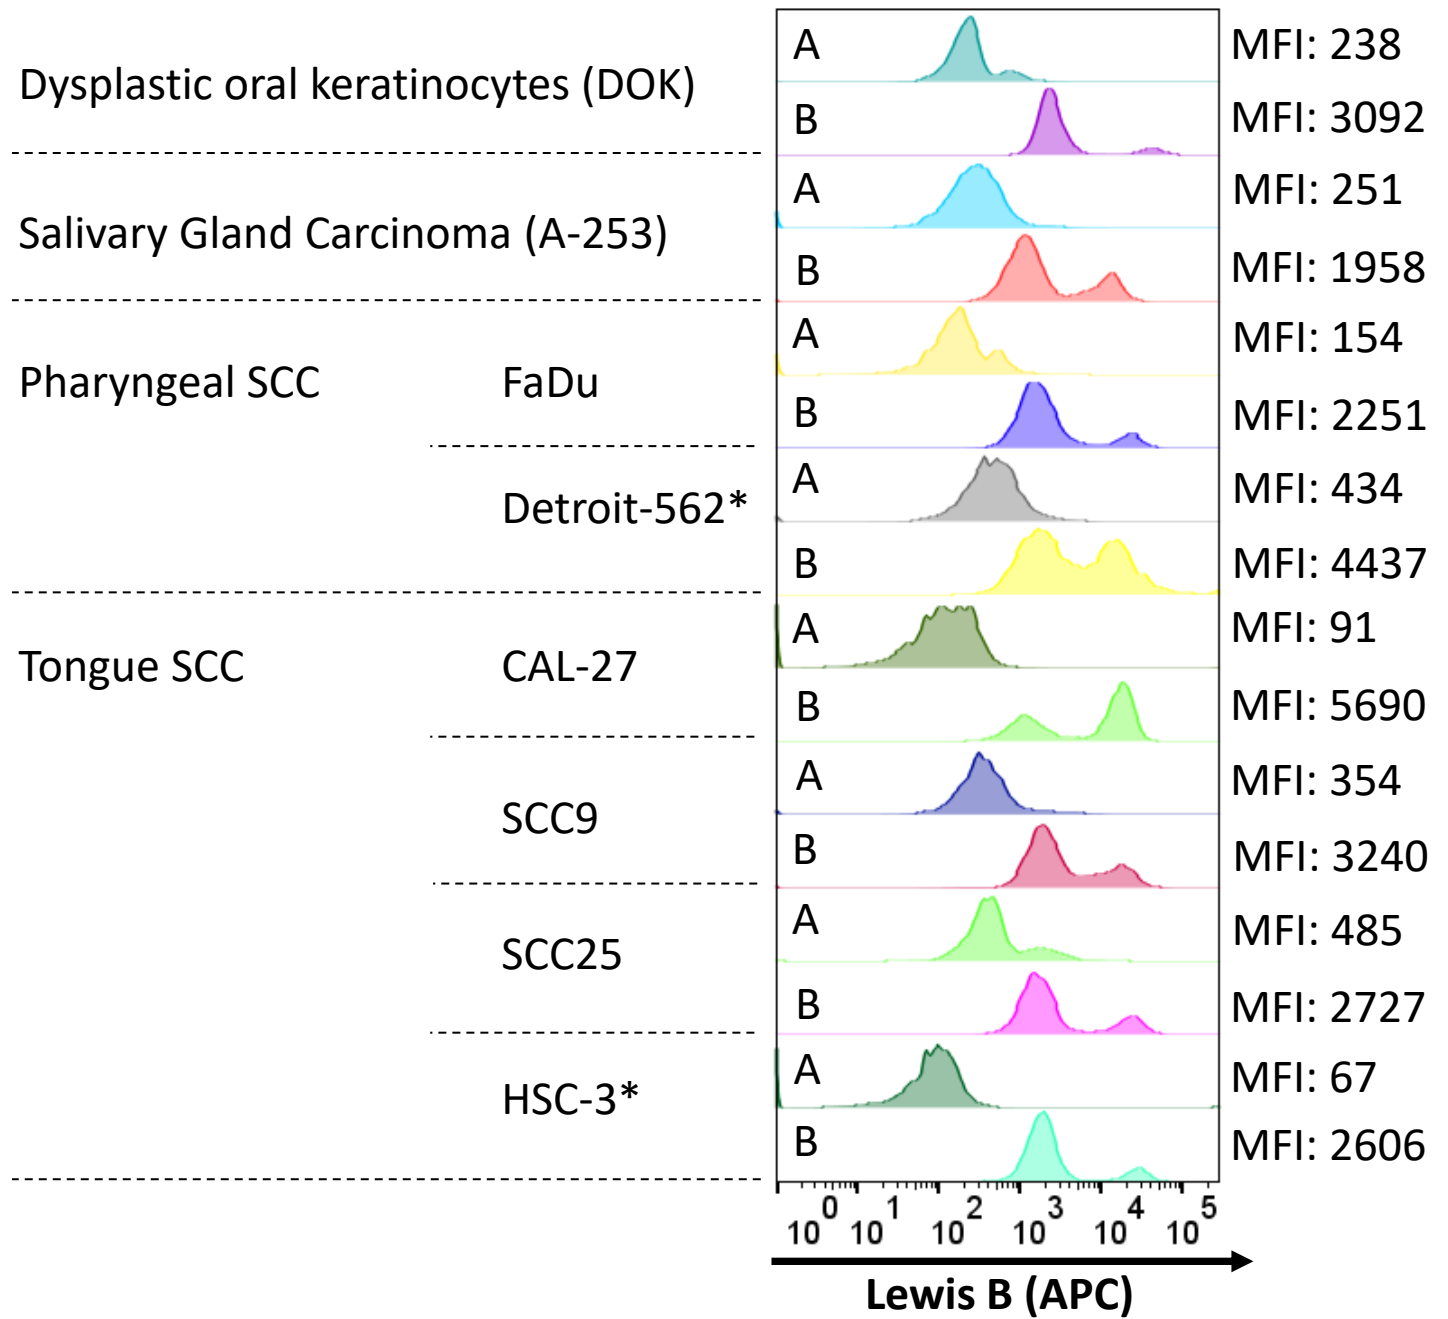

## Supplementary Figure 5

| Rule                                                    | Value                                        |
|---------------------------------------------------------|----------------------------------------------|
| Protein database                                        | uniprot-reviewed Homo+sapiens-3-5-2021.fasta |
| Spectrum-level FDR                                      | Auto cut                                     |
| Cleavage residues                                       | KR                                           |
| Digest cutter                                           | C-terminal cutter                            |
| Peptide termini                                         | Fully specific                               |
| Maximum number of missed cleavages                      | 2                                            |
| Precursor tolerance                                     | 10.0 ppm                                     |
| Fragment tolerance                                      | frag:qtof_hcd 20.0 ppm                       |
| Fragment tolerance version                              | 2                                            |
| Charges applied to charge-unassigned spectra:           | 1,2,3                                        |
| Precursor mass max                                      | 10000.0                                      |
| Off by x isotopes                                       | -2,-1,0,+1,+2                                |
| Contaminants added                                      | false                                        |
| Decoys added                                            | true                                         |
| Combyne cut off score                                   | Auto                                         |
| Protein FDR cutoff                                      | 1%                                           |
| Focused DB created                                      | false                                        |
| Export mzIdentML                                        | false                                        |
| Score version                                           | 2                                            |
| precursor_assignment_flags                              | 2                                            |
| po_NumberMonosReturn                                    | 2                                            |
| Lock mass list                                          | None                                         |
| %Modification searches:                                 |                                              |
| common_modifications_max                                | 2                                            |
| rare_modifications_max                                  | 1                                            |
| N-glycan 309 mammalian no sodium.txt] @ NGlycan   rare1 |                                              |
| % Custom modification text below                        |                                              |
| Show all N-glycopeptides                                | 0                                            |
| Product Version                                         | PMI-Byonic-Demo:v4.0.12                      |

# Epidermal Growth Factor Receptor (EGFR) Glycopeptide (N389) HSC-3 tongue squamous carcinoma cells

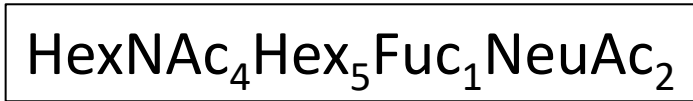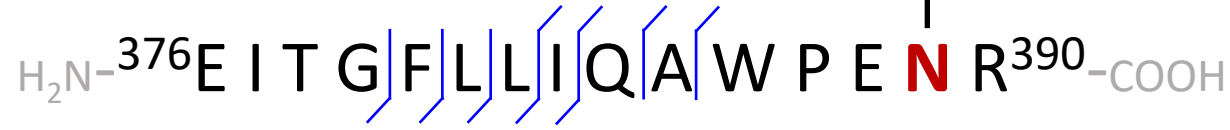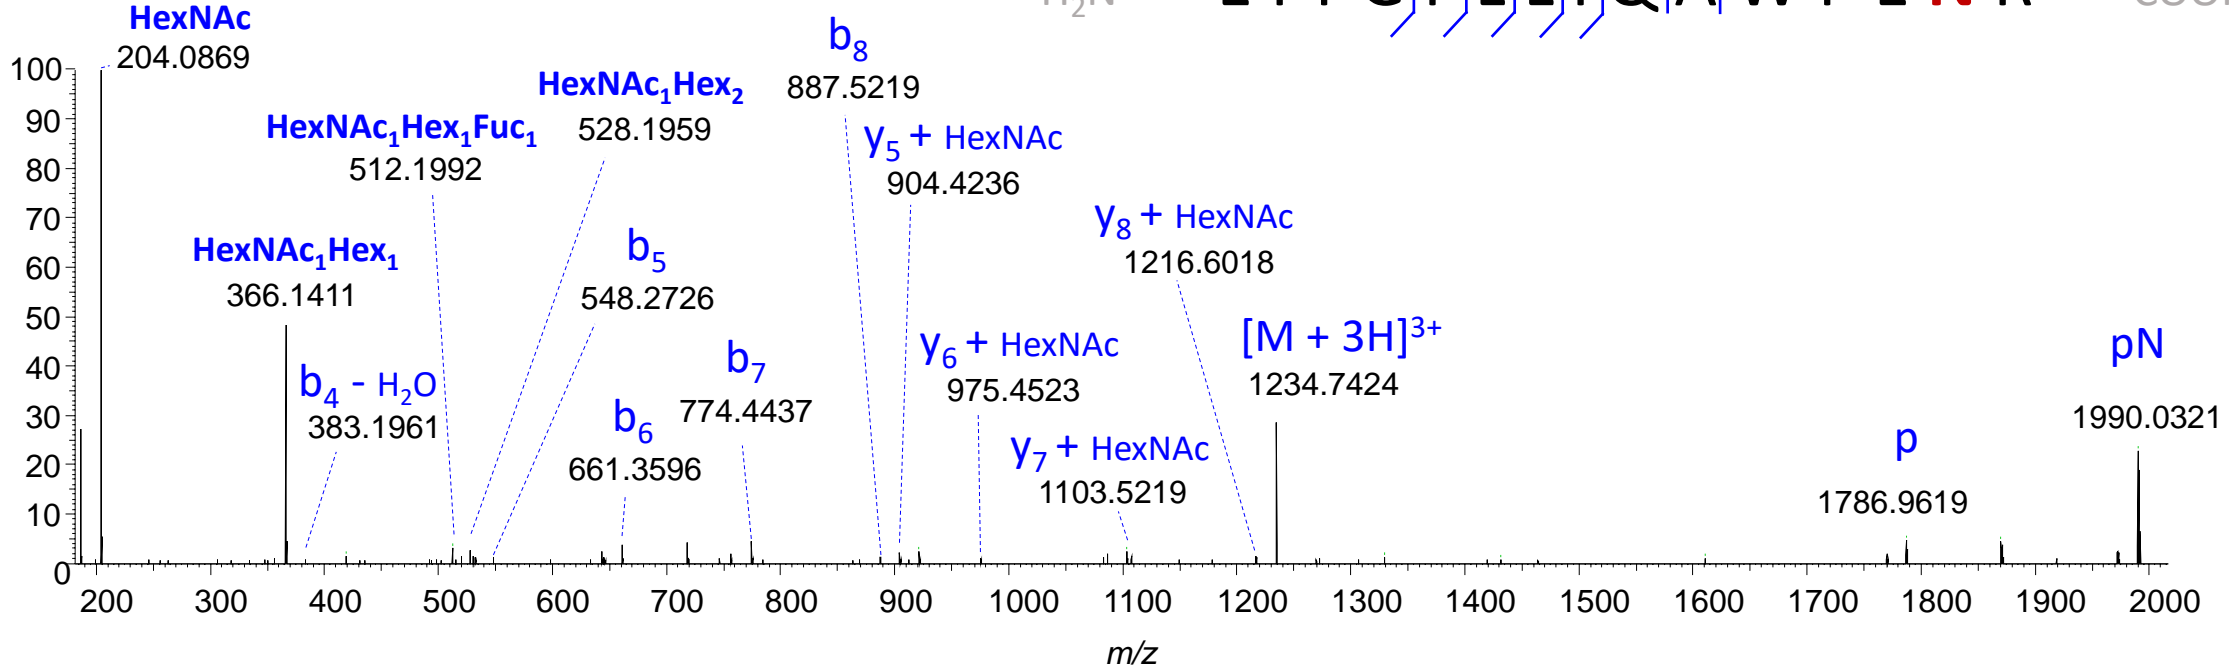

Supplement: supplementary_figures_cwab131.pdf [file supplementary_figures_cwab131.pdf]
